# Supplementary material
Source: PubMed Central journal article supplement (PMC7529896)
Supplement: NIHMS1598556-supplement-Stanczyk_authorship_change_form.pdf [file NIHMS1598556-supplement-Stanczyk_authorship_change_form.pdf]

# OBSTETRICS & GYNECOLOGY

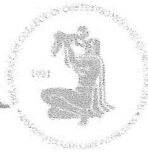

May 11, 2020

Intira Sriprasert  
University of Southern California Keck School of Medicine  
Preventive Medicine  
2001 N Soto St  
Los Angeles, CA 90032

**Re: Changes in Authorship for ONG 20-262R1 (Factors Associated With Serum Estradiol Levels Among Postmenopausal Women Using Hormone Therapy)**

Dear Dr. Sriprasert:

Per your request to add Donna Shoupe as a coauthor, we need written consent from *all* of the individuals named in the byline of your manuscript. In accordance with Committee on Publication Ethics (COPE) guidelines, *Obstetrics & Gynecology* requires that each coauthor acknowledge this change to the byline. *This includes the authors listed below, as well as the one individual who is being added.*

Please have each individual sign and return this letter to indicate that everyone has reviewed, and approves of, the updated author list for this manuscript. The updated list is to appear as follows:

Authors (in order of appearance):

- Intira Sriprasert
- Naoko Kono
- Rokhsana Karim
- Howard N. Hodis
- Frank Z. Stanczyk
- Donna Shoupe
- Wendy J. Mack

Being added:

- Donna Shoupe

I, FRANK STANCZYK (PRINT YOUR NAME), confirm that I acknowledge the changes to the final author list for the manuscript. I approve of the author list that is stated above in any subsequent version of the manuscript being considered by *Obstetrics & Gynecology*.

SIGNED: Frank Stanczyk

DATE: May 13th, 2020

Signed consent forms may be returned directly to [rzung@greenjournal.org](mailto:rzung@greenjournal.org).
