# Supplementary material
Source: PubMed Central journal article supplement (PMC7529896)
Supplement: NIHMS1598556-supplement-Supplemental_Digital_Content_1.pdf [file NIHMS1598556-supplement-Supplemental_Digital_Content_1.pdf]

**Appendix 1. Association of Log Serum Estradiol Levels While Taking Hormone Therapy With Demographic and Clinical Characteristics**

| <b>Variable</b>                       | <b>Beta</b> | <b>Standard error</b> |
|---------------------------------------|-------------|-----------------------|
| Age* (years)                          | -0.0022     | 0.0041                |
| Race/Ethnicity                        |             |                       |
| White, non-Hispanic                   | Reference   |                       |
| African American, non-Hispanic        | -0.0195     | 0.1049                |
| Hispanic                              | 0.0163      | 0.0895                |
| Asian, non-Hispanic                   | 0.0047      | 0.1022                |
| Body mass index* (kg/m <sup>2</sup> ) | 0.0138      | 0.0044                |
| Weight* (kg)                          | 0.0020      | 0.0007                |
| Time since menopause (years)          | -0.0023     | 0.0038                |
| Time since menopause* (years)         | -0.0024     | 0.0038                |
| Time since menopause                  |             |                       |
| Early postmenopause                   | Reference   |                       |
| Late postmenopause                    | -0.0393     | 0.0549                |
| Menopause type                        |             |                       |
| Natural                               | Reference   |                       |
| Surgical                              | 0.1808      | 0.0874                |
| Menopause type                        |             |                       |
| Natural, early                        | Reference   |                       |
| Natural, late                         | -0.0557     | 0.0576                |
| Surgical, early                       | 0.2783      | 0.1893                |
| Surgical, late                        | 0.1225      | 0.1005                |
| Creatinine* (mg/dL)                   | 0.1088      | 0.1470                |
| Creatinine clearance* (ml/min)        | 0.0011      | 0.0009                |
| Aspartate aminotransferase* (U/L)     | -0.0004     | 0.0029                |
| Alanine aminotransferase* (U/L)       | -0.0011     | 0.0024                |
| Fasting blood glucose* (mg/dl)        | 0.0020      | 0.0023                |

Sriprasert I, Kono N, Karim R, Hodis HN, Stanczyk FZ, Shoupe D, et al. Factors associated with serum estradiol levels among postmenopausal women using hormone therapy. *Obstet Gynecol* 2020;136.

The authors provided this information as a supplement to their article.

©2020 American College of Obstetricians and Gynecologists.

|                                                      |           |        |
|------------------------------------------------------|-----------|--------|
| Smoking status*                                      |           |        |
| Never                                                | Reference |        |
| Past smoker                                          | -0.1584   | 0.0561 |
| Current smoker                                       | -0.4013   | 0.0988 |
| Alcohol use*                                         |           |        |
| None                                                 | Reference |        |
| <1 drink per day                                     | 0.0353    | 0.0353 |
| 1-2 drinks per day                                   | 0.0899    | 0.0563 |
| >2 drinks per day                                    | 0.5176    | 0.1153 |
| Total weekly MET hours*                              | -0.0003   | 0.0005 |
| Moderate + vigorous activity weekly hours*, tertiles |           |        |
| 0 - 2.60                                             | Reference |        |
| 2.62 - 6.75                                          | -0.0383   | 0.2682 |
| 6.80+                                                | -0.0297   | 0.0306 |
| Medications and supplements                          |           |        |
| Lipid lowering medication*                           |           |        |
| No                                                   | Reference |        |
| Yes                                                  | 0.0165    | 0.0455 |
| Statin use*                                          |           |        |
| No                                                   | Reference |        |
| Yes                                                  | 0.0229    | 0.0474 |
| Antihypertensive medication*                         |           |        |
| No                                                   | Reference |        |
| Yes                                                  | 0.1093    | 0.0474 |
| Calcium channel blocker*                             |           |        |
| No                                                   | Reference |        |
| Yes                                                  | 0.0575    | 0.0922 |
| Diabetes medication*                                 |           |        |
| No                                                   | Reference |        |
| Yes                                                  | -0.0881   | 0.2145 |
| Antifungal medication*                               |           |        |

Sriprasert I, Kono N, Karim R, Hodis HN, Stanczyk FZ, Shoupe D, et al. Factors associated with serum estradiol levels among postmenopausal women using hormone therapy. *Obstet Gynecol* 2020;136.

The authors provided this information as a supplement to their article.

©2020 American College of Obstetricians and Gynecologists.

Page 2 of 5

|                            |           |        |
|----------------------------|-----------|--------|
| No                         | Reference |        |
| Yes                        | -0.2170   | 0.0832 |
| Anticonvulsant medication* |           |        |
| No                         | Reference |        |
| Yes                        | -0.1025   | 0.0821 |
| Multivitamin use           |           |        |
| Never                      | Reference |        |
| Took regularly in the past | -0.0260   | 0.0862 |
| Take regularly now         | -0.0558   | 0.0727 |
| Vitamin E use              |           |        |
| Never                      | Reference |        |
| Took regularly in the past | 0.0985    | 0.0629 |
| Take regularly now         | 0.0707    | 0.0761 |
| Fish oil use               |           |        |
| Never                      | Reference |        |
| Took regularly in the past | 0.0907    | 0.0910 |
| Take regularly now         | 0.0455    | 0.0621 |

Beta estimates and standard errors are from mixed effects linear model, adjusted for baseline serum estradiol level, follow-up visit and reduced estradiol dose indicator.

\*Time varying variable

**Appendix 2. Multivariable Association of Log-Transformed Estradiol Levels While Taking Hormone Therapy With Demographic and Clinical Characteristics Among Total Sample and by Postmenopausal**

**Strata**

| Variable                              | Total analysis sample |                | Early postmenopause |                | Late postmenopause |                |
|---------------------------------------|-----------------------|----------------|---------------------|----------------|--------------------|----------------|
|                                       | Beta                  | Standard error | Beta                | Standard error | Beta               | Standard error |
| Body mass index (kg/m <sup>2</sup> )* | 0.0149                | 0.0042         | 0.0108              | 0.0060         | 0.0179             | 0.0059         |
| Smoking status*                       |                       |                |                     |                |                    |                |
| Never                                 |                       |                | Reference           |                |                    |                |
| Past smoker                           | -0.1606               | 0.0547         | 0.2477              | 0.0826         | -0.0768            | 0.0733         |
| Current smoker                        | -0.3991               | 0.0973         | 0.4285              | 0.1241         | -0.4191            | 0.1669         |
| Alcohol use*                          |                       |                |                     |                |                    |                |
| None                                  |                       |                | Reference           |                |                    |                |
| <1 drink per day                      | 0.0406                | 0.0351         | 0.0162              | 0.0536         | 0.0541             | 0.0468         |
| 1-2 drinks per day                    | 0.0952                | 0.0557         | 0.1124              | 0.0803         | 0.0640             | 0.0790         |
| >2 drinks per day                     | 0.5294                | 0.1143         | 0.8052              | 0.1623         | 0.2317             | 0.1614         |

Beta estimates and standard errors are from mixed effects linear model, adjusted for baseline serum estradiol level, follow-up visit and reduced estradiol dose indicator;

\*Time varying variable

### Appendix 3. Estimated Serum Estradiol Levels for Each Multivariable Model Determinant

| Variable                 | Least square mean (pg/ml)    | 95% confidence interval (pg/ml) |
|--------------------------|------------------------------|---------------------------------|
| Body mass index category | < 25 kg/m <sup>2</sup>       | 37.9                            |
|                          | 25 to < 30 kg/m <sup>2</sup> | 41.1                            |
|                          | ≥ 30 kg/m <sup>2</sup>       | 43.2                            |
| Smoking status           | Never                        | 43.2                            |
|                          | Past smoker                  | 36.9                            |
|                          | Current smoker               | 28.9                            |
| Alcohol use              | None                         | 39.0                            |
|                          | <1 drink per day             | 40.4                            |
|                          | 1-2 drinks per day           | 42.7                            |
|                          | >2 drinks per day            | 65.5                            |

Least square means are from mixed effects linear model, adjusted for baseline serum estradiol level, follow-up visit and reduced estradiol dose indicator
